# Supplementary material
Source: PubMed Central journal article supplement (PMC6985715)
Supplement: AAC.01899-19-s0001.pdf [file AAC.01899-19-s0001.pdf]

**Supp. Table 1:** The accession numbers of the KatG proteins used in the multiple sequence analysis

| <b>Mycobacterium</b>                   | <b>UniProtKB</b> |
|----------------------------------------|------------------|
| <i>M. tuberculosis</i>                 | P9WIE5           |
| <i>M. avium paratuberculosis (K10)</i> | Q73ZD5           |
| <i>M. marinum</i>                      | B2HE73           |
| <i>M. smegmatis</i>                    | A0QXX7           |
| <i>M. haemophilum</i>                  | A0A0I9UM98       |

**Supp. Table 2:** Percent Identity Matrix - created by Clustal2.1

|                                        | <i>M.tuberculosis</i> | <i>M.haemophilum</i> | <i>M.smegmatis</i> | MAP   | <i>M. marinum</i> |
|----------------------------------------|-----------------------|----------------------|--------------------|-------|-------------------|
| <i>M.tuberculosis</i>                  | 100                   | 86.47                | 66.26              | 68.56 | 68.7              |
| <i>M.haemophilum</i>                   | 86.47                 | 100                  | 65.49              | 67.93 | 68.2              |
| <i>M.smegmatis</i>                     | 66.26                 | 65.49                | 100                | 84.22 | 81.29             |
| <i>M. avium paratuberculosis (K10)</i> | 68.56                 | 67.93                | 84.22              | 100   | 85.73             |
| <i>M. marinum</i>                      | 68.7                  | 68.2                 | 81.29              | 85.73 | 100               |

|                           | 1. <i>M. gilvum</i> | 2. <i>M. fortuitum</i> | 3. <i>M. smegmatis</i> | 4. <i>M. marinum</i> | 5. <i>M. ulcerans</i> | 6. <i>M. asiaticum</i> | 7. <i>M. gordonae</i> | 8. <i>M. shigaense</i> | 9. <i>M. szulgai</i> | 10. <i>M. scrofulaceum</i> | 11. <i>M. intracellulare</i> | 12. MAP | 13. <i>M. avium</i> | 14. <i>M. kansasii</i> | 15. <i>M. malmoense</i> | 16. <i>M. vanbaalenii</i> | 17. <i>Nocardia farcinica</i> | 18. <i>M. abscessus</i> | 19. <i>M. chelonae</i> | 20. <i>M. haemophilum</i> | 21. <i>M. microti</i> | 22. Mtb | 23. <i>M. canettii</i> | 24. <i>M. africanum</i> |
|---------------------------|---------------------|------------------------|------------------------|----------------------|-----------------------|------------------------|-----------------------|------------------------|----------------------|----------------------------|------------------------------|---------|---------------------|------------------------|-------------------------|---------------------------|-------------------------------|-------------------------|------------------------|---------------------------|-----------------------|---------|------------------------|-------------------------|
| <i>M. gilvum</i>          | 100                 | 78.28                  | 77.28                  | 75.81                | 75.41                 | 78.41                  | 79.19                 | 78.31                  | 79.62                | 78.84                      | 78.44                        | 79.17   | 79.3                | 77.9                   | 78.3                    | 59.86                     | 61.01                         | 62.43                   | 62.02                  | 63.64                     | 63.04                 | 62.91   | 63.04                  | 63.04                   |
| <i>M. fortuitum</i>       | 78.28               | 100                    | 80.16                  | 78.27                | 77.73                 | 78.6                   | 77.63                 | 78.9                   | 81.02                | 79.95                      | 79.97                        | 80.56   | 80.7                | 79.7                   | 79.97                   | 59.81                     | 61.82                         | 61.75                   | 61.75                  | 64.45                     | 64.54                 | 64.4    | 64.54                  | 64.54                   |
| <i>M. smegmatis</i>       | 77.28               | 80.16                  | 100                    | 81.16                | 80.62                 | 84.43                  | 82.53                 | 82.53                  | 84.97                | 82.01                      | 83.91                        | 84.22   | 84.49               | 84.45                  | 83.38                   | 60.08                     | 61.28                         | 62.81                   | 62.67                  | 65.63                     | 66.53                 | 66.4    | 66.53                  | 66.53                   |
| <i>M. marinum</i>         | 75.81               | 78.27                  | 81.16                  | 100                  | 99.33                 | 81.67                  | 82.19                 | 83.08                  | 85.44                | 84.12                      | 84.52                        | 85.73   | 85.87               | 86.94                  | 87.35                   | 60.61                     | 62.59                         | 65.08                   | 64.26                  | 68.16                     | 68.79                 | 68.66   | 68.79                  | 68.79                   |
| <i>M. ulcerans</i>        | 75.41               | 77.73                  | 80.62                  | 99.33                | 100                   | 81.13                  | 81.92                 | 82.53                  | 85.18                | 83.58                      | 83.98                        | 85.2    | 85.33               | 86.41                  | 86.81                   | 60.47                     | 62.59                         | 65.08                   | 64.39                  | 68.02                     | 68.66                 | 68.52   | 68.66                  | 68.66                   |
| <i>M. asiaticum</i>       | 78.41               | 78.6                   | 84.43                  | 81.67                | 81.13                 | 100                    | 88.58                 | 88.17                  | 88.98                | 85.62                      | 87.79                        | 86.98   | 87.25               | 86.58                  | 87.52                   | 59.78                     | 62.4                          | 63.93                   | 63.52                  | 64.99                     | 66.98                 | 66.85   | 66.98                  | 66.98                   |
| <i>M. gordonae</i>        | 79.19               | 77.63                  | 82.53                  | 82.19                | 81.92                 | 88.58                  | 100                   | 89.39                  | 89.52                | 85.73                      | 86.83                        | 87.1    | 87.23               | 86.29                  | 86.69                   | 59.86                     | 62.07                         | 64.3                    | 64.02                  | 66.03                     | 67.35                 | 67.21   | 67.35                  | 67.35                   |
| <i>M. shigaense</i>       | 78.31               | 78.9                   | 82.53                  | 83.08                | 82.53                 | 88.17                  | 89.39                 | 100                    | 88.71                | 88.31                      | 89.27                        | 89.27   | 89.41               | 87.07                  | 87.48                   | 62.59                     | 62.97                         | 66.11                   | 65.56                  | 67.5                      | 68.6                  | 68.46   | 68.6                   | 68.6                    |
| <i>M. szulgai</i>         | 79.62               | 81.02                  | 84.97                  | 85.44                | 85.18                 | 88.98                  | 89.52                 | 88.71                  | 100                  | 89.11                      | 90.07                        | 89.93   | 90.2                | 89.66                  | 89.26                   | 61.71                     | 62.67                         | 64.62                   | 65.03                  | 66.89                     | 68.34                 | 68.21   | 68.34                  | 68.34                   |
| <i>M. scrofulaceum</i>    | 78.84               | 79.95                  | 82.01                  | 84.12                | 83.58                 | 85.62                  | 85.73                 | 88.31                  | 89.11                | 100                        | 90.2                         | 90.6    | 90.87               | 89.13                  | 89.66                   | 61.62                     | 62.04                         | 64.94                   | 64.26                  | 66.94                     | 67.71                 | 67.57   | 67.71                  | 67.71                   |
| <i>M. intracellulare</i>  | 78.44               | 79.97                  | 83.91                  | 84.52                | 83.98                 | 87.79                  | 86.83                 | 89.27                  | 90.07                | 90.2                       | 100                          | 92.63   | 93.03               | 90.21                  | 90.88                   | 61.62                     | 64.08                         | 65.48                   | 64.8                   | 67.62                     | 68.79                 | 68.66   | 68.79                  | 68.79                   |
| MAP                       | 79.17               | 80.56                  | 84.22                  | 85.73                | 85.2                  | 86.98                  | 87.1                  | 89.27                  | 89.93                | 90.6                       | 92.63                        | 100     | 99.6                | 90.08                  | 90.88                   | 61.45                     | 63.99                         | 66.21                   | 65.67                  | 67.93                     | 68.7                  | 68.56   | 68.7                   | 68.7                    |
| <i>M. avium</i>           | 79.3                | 80.7                   | 84.49                  | 85.87                | 85.33                 | 87.25                  | 87.23                 | 89.41                  | 90.2                 | 90.87                      | 93.03                        | 99.6    | 100                 | 90.35                  | 91.15                   | 61.59                     | 63.99                         | 66.35                   | 65.8                   | 68.06                     | 68.97                 | 68.83   | 68.97                  | 68.97                   |
| <i>M. kansasii</i>        | 77.9                | 79.7                   | 84.45                  | 86.94                | 86.41                 | 86.58                  | 86.29                 | 87.07                  | 89.66                | 89.13                      | 90.21                        | 90.08   | 90.35               | 100                    | 90.88                   | 62.04                     | 63.95                         | 65.89                   | 65.21                  | 68.16                     | 69.34                 | 69.2    | 69.34                  | 69.34                   |
| <i>M. malmoense</i>       | 78.3                | 79.97                  | 83.38                  | 87.35                | 86.81                 | 87.52                  | 86.69                 | 87.48                  | 89.26                | 89.66                      | 90.88                        | 90.88   | 91.15               | 90.88                  | 100                     | 60.94                     | 63.27                         | 65.76                   | 64.8                   | 67.75                     | 69.06                 | 68.93   | 69.06                  | 69.06                   |
| <i>M. vanbaalenii</i>     | 59.86               | 59.81                  | 60.08                  | 60.61                | 60.47                 | 59.78                  | 59.86                 | 62.59                  | 61.71                | 61.62                      | 61.62                        | 61.45   | 61.59               | 62.04                  | 60.94                   | 100                       | 64.64                         | 72.83                   | 72.97                  | 69.93                     | 69.34                 | 69.48   | 69.48                  | 69.48                   |
| <i>Nocardia farcinica</i> | 61.01               | 61.82                  | 61.28                  | 62.59                | 62.59                 | 62.4                   | 62.07                 | 62.97                  | 62.67                | 62.04                      | 64.08                        | 63.99   | 63.99               | 63.95                  | 63.27                   | 64.64                     | 100                           | 70.26                   | 69.99                  | 73.81                     | 73.37                 | 73.37   | 73.51                  | 73.51                   |
| <i>M. abscessus</i>       | 62.43               | 61.75                  | 62.81                  | 65.08                | 65.08                 | 63.93                  | 64.3                  | 66.11                  | 64.62                | 64.94                      | 65.48                        | 66.21   | 66.35               | 65.89                  | 65.76                   | 72.83                     | 70.26                         | 100                     | 94.72                  | 75.48                     | 73.26                 | 73.26   | 73.4                   | 73.4                    |
| <i>M. chelonae</i>        | 62.02               | 61.75                  | 62.67                  | 64.26                | 64.39                 | 63.52                  | 64.02                 | 65.56                  | 65.03                | 64.26                      | 64.8                         | 65.67   | 65.8                | 65.21                  | 64.8                    | 72.97                     | 69.99                         | 94.72                   | 100                    | 76.02                     | 74.62                 | 74.62   | 74.76                  | 74.76                   |
| <i>M. haemophilum</i>     | 63.64               | 64.45                  | 65.63                  | 68.16                | 68.02                 | 64.99                  | 66.03                 | 67.5                   | 66.89                | 66.94                      | 67.62                        | 67.93   | 68.06               | 68.16                  | 67.75                   | 69.93                     | 73.81                         | 75.48                   | 76.02                  | 100                       | 86.47                 | 86.47   | 86.6                   | 86.6                    |
| <i>M. microti</i>         | 63.04               | 64.54                  | 66.53                  | 68.79                | 68.66                 | 66.98                  | 67.35                 | 68.6                   | 68.34                | 67.71                      | 68.79                        | 68.7    | 68.97               | 69.34                  | 69.06                   | 69.34                     | 73.37                         | 73.26                   | 74.62                  | 86.47                     | 100                   | 99.73   | 99.86                  | 99.86                   |
| Mtb                       | 62.91               | 64.4                   | 66.4                   | 68.66                | 68.52                 | 66.85                  | 67.21                 | 68.46                  | 68.21                | 67.57                      | 68.66                        | 68.56   | 68.83               | 69.2                   | 68.93                   | 69.48                     | 73.37                         | 73.26                   | 74.62                  | 86.47                     | 99.73                 | 100     | 99.86                  | 99.86                   |
| <i>M. canettii</i>        | 63.04               | 64.54                  | 66.53                  | 68.79                | 68.66                 | 66.98                  | 67.35                 | 68.6                   | 68.34                | 67.71                      | 68.79                        | 68.7    | 68.97               | 69.34                  | 69.06                   | 69.48                     | 73.51                         | 73.4                    | 74.76                  | 86.6                      | 99.86                 | 99.86   | 100                    | 100                     |
| <i>M. africanum</i>       | 63.04               | 64.54                  | 66.53                  | 68.79                | 68.66                 | 66.98                  | 67.35                 | 68.6                   | 68.34                | 67.71                      | 68.79                        | 68.7    | 68.97               | 69.34                  | 69.06                   | 69.48                     | 73.51                         | 73.4                    | 74.76                  | 86.6                      | 99.86                 | 99.86   | 100                    | 100                     |

Supplementary Table 3: Comparison of identity between 23 different mycobacteria (and *N. farcinica*) in their KatG protein.

## Supplementary figure 1:

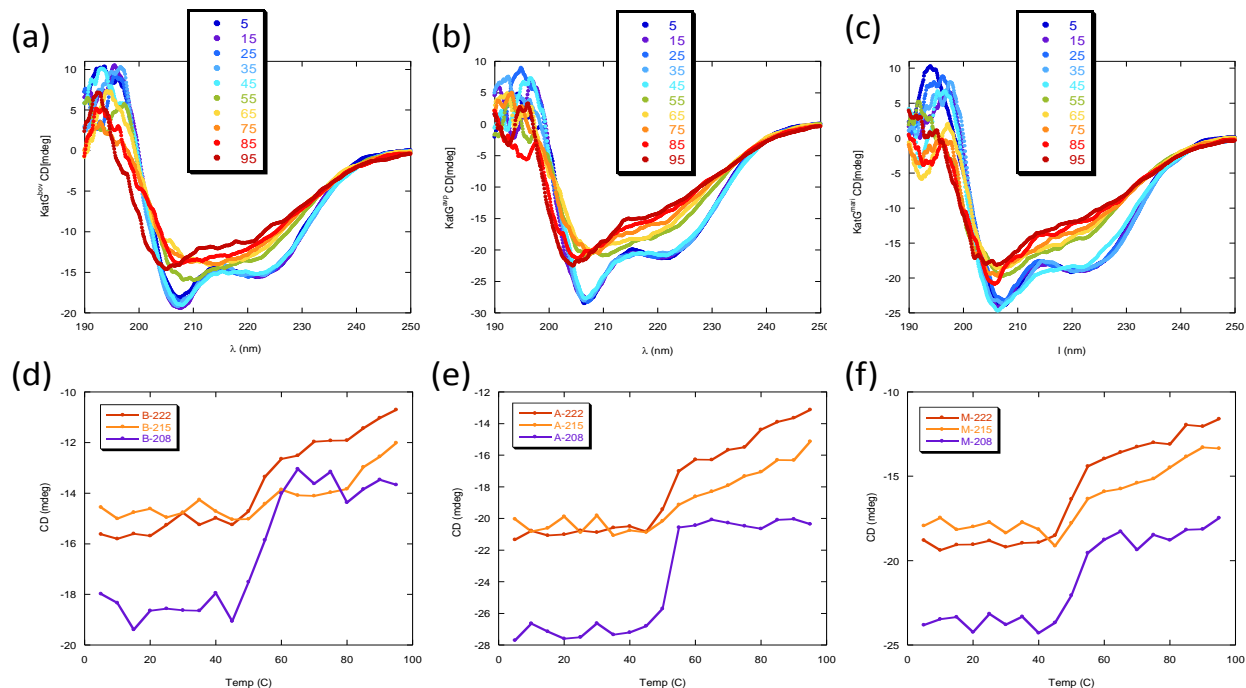

Supplementary Figure 1: Upper panel: Temperature dependence of the Far-UV CD spectrum of (A) KatG<sup>bov</sup>, (B) KatG<sup>apv</sup> and (C) KatG<sup>mari</sup> in 25 mM phosphate buffer, pH 7.2, 25°C. Changes in the CD spectra were monitored as a function of temperature from 5 to 95 °C in 5 °C steps, spectra are shown only for every 10 °C change for clarity.

Lower panel: Singular wavelength changes of the signal at 222, 215 and 208 with temperature are presented for (D) KatG<sup>bov</sup>, (E) KatG<sup>apv</sup> and (F) KatG<sup>mari</sup>.

## Supplementary figure 2:

(a)

(b)

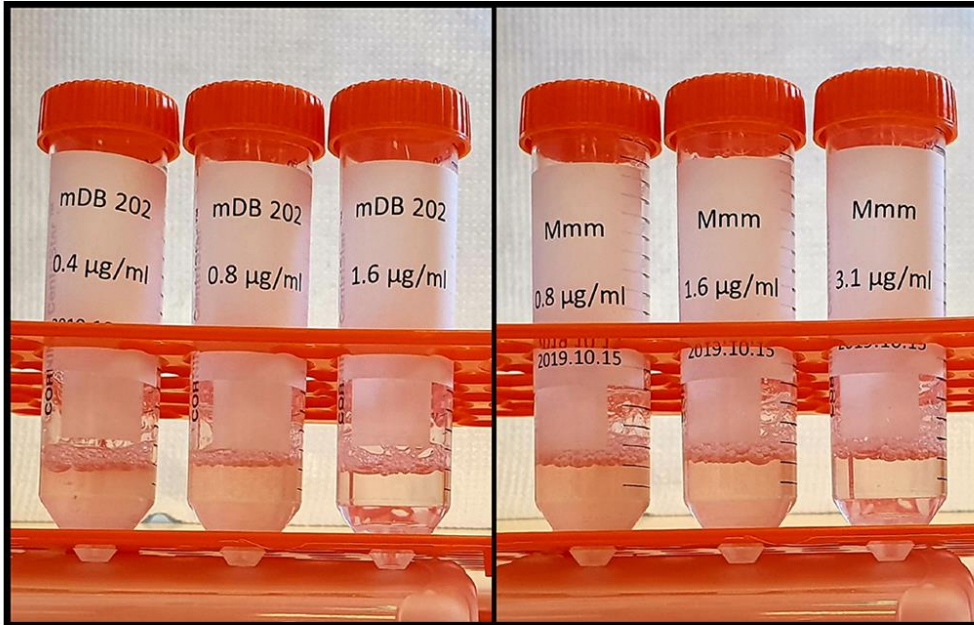

**Supplementary Figure 2:** The MIC to isoniazid was compared between WT *M. marinum* (Mmm, right) and *M. marinum*<sup>KatG-mar</sup> (mutant mDB202, over-expressing its own KatG), on the left. Overexpression of KatG reduced the MIC X2, from ~3.1 µg/ml to ~1.6 µg/ml.
